# Supplementary material for: Innovationsfonds und Primärversorgung – Welche Erwartungen und Erfahrungen vertreten Hausärzt*innen in Bezug auf die Teilnahme an innovativen Versorgungsmodellen?
Source: Springer Nature journal article supplement (doi:10.1007/s00103-022-03533-y), 2022-04-27
Supplement: MOESM1 [file 20348900]

**- Fragebogen: Hausärztliche Einstellungen zu und Erfahrungen mit Innovationsfonds-Studien -**

1. Im Jahr 2016 wurde der sogenannte Innovationsfonds des Gemeinsamen Bundesausschusses (G-BA) eingerichtet, der zur Verbesserung der medizinischen Versorgung innerhalb der gesetzlichen Krankenversicherung neue Versorgungsformen und die Versorgungsforschung finanziell fördert. In der derzeitigen Förderphase stehen jährlich 200 Millionen Euro an Fördervolumen bereit, die von den gesetzlichen Krankenkassen und dem Gesundheitsfonds getragen werden. Gefördert wurden u.a. Versorgungsmodelle in strukturschwachen oder ländlichen Gebieten, für spezielle Patient\*innen-gruppen (z.B. ältere Menschen, Menschen mit psychischen und/oder seltenen Erkrankungen), zur Arzneimitteltherapie oder Modelle mit Delegation. Insbesondere werden Projekte gefördert, die zur Verbesserung der sektorenübergreifenden Versorgung beitragen und ein Umsetzungspotential besitzen sowie Projekte, deren Ziel in der dauerhaften Weiterentwicklung der selektivvertraglichen Versorgung besteht. Bei Projekterfolg und nachgewiesener Wirksamkeit der entsprechenden Interventionen besteht die Aussicht auf Übernahme in die Regelversorgung oder Aufnahme in große Selektivverträge.

**War Ihnen bekannt, dass es den Innovationsfonds gibt, oder ist Ihnen dies neu?**

- War mir bekannt                       Ist mir neu

2. Auch vertragsärztlich tätige Hausarzt\*innen können an Innovationsfondsprojekten teilnehmen und hierzu Patient\*innen einschreiben. Die Teilnahme an Innovationsfondsprojekten ermöglicht Ihnen etwa, Ihren Patient\*innen neue Versorgungsformen anzubieten (z.B. Unterstützung der Versorgung durch bestimmte diagnostische bzw. therapeutische Maßnahmen oder telemedizinische Geräte), die bislang nicht Teil der Regelversorgung sind. Je nach Projekt besteht dabei die Möglichkeit, die Versorgungsform Patient\*innen nicht nur einer, sondern aller gesetzlichen Krankenkassen anzubieten. Darüber hinaus erhalten Hausarzt\*innen für diese Form der Versorgung eine zusätzliche Vergütung.

**War Ihnen bekannt, dass es Hausarzt\*innen möglich ist, an Innovationsfonds-Projekten teilzunehmen, oder ist Ihnen dies neu?**

- War mir bekannt                       Ist mir neu

3. **Käme es grundsätzlich für Sie in Frage, an einem Innovationsfonds-Projekt teilzunehmen, oder war das vielleicht bereits der Fall, oder käme eine solche Teilnahme grundsätzlich nicht für Sie in Frage?**

- Käme in Frage,  
und zwar aus folgendem Grund/Gründen (einige Stichpunkte genügen):

---

---

- Habe bereits teilgenommen

- Käme grundsätzlich nicht in Frage, => bitte direkt zu **Frage 5** übergehen  
und zwar aus folgendem Grund/Gründen (einige Stichpunkte genügen):

---

---

- Fragebogen: Hausärztliche Einstellungen zu und Erfahrungen mit Innovationsfonds-Studien -

4. Welche der folgenden Aspekte wären für Sie als Voraussetzungen besonders wichtig, damit es für Sie in Frage kommt, an einem Innovationsfonds-Projekt teilzunehmen?

Bitte geben Sie max. 5 Punkte an.

- |                       |                                                                                                                                                                                                                                            |
|-----------------------|--------------------------------------------------------------------------------------------------------------------------------------------------------------------------------------------------------------------------------------------|
| <input type="radio"/> | Es muss ein klarer diagnostischer bzw. therapeutischer Nutzen und Versorgungsvorteil für meine Patient*innen erkennbar sein (z.B. erfolgreicherer Management multimorbider und chronisch kranker Patientengruppen, optimierte Diagnostik). |
| <input type="radio"/> | Der (Mehr-)Aufwand bei einer Teilnahme muss überschaubar bleiben (z.B. Vor- und Nachbereitung, Dokumentationsaufwand).                                                                                                                     |
| <input type="radio"/> | Es muss eine angemessene Vergütung für teilnehmende Hausärzt*innen geben.                                                                                                                                                                  |
| <input type="radio"/> | Im Rahmen des Projekts werden Hausärzt*innen geschult, sodass sie ihre diagnostischen bzw. therapeutischen Kompetenzen in einem Themengebiet erweitern können (z.B. im Hinblick auf Evidenzbasierung oder Leitlinienorientierung).         |
| <input type="radio"/> | Die hausärztliche Rolle und Stellung im Gesundheitswesen sollte durch das Projekt gestärkt und Hausärzt*innen in ihrer Bedeutung aufgewertet werden.                                                                                       |
| <input type="radio"/> | Die Zusammenarbeit zwischen verschiedenen Versorgungsebenen bzw. Sektoren sollte durch das Projekt verbessert werden.                                                                                                                      |
| <input type="radio"/> | Das Projekt sollte die interdisziplinäre, multiprofessionelle Versorgung stärken und diese mit der Hausarztmedizin (besser) verzahnen.                                                                                                     |
| <input type="radio"/> | Das Projekt sollte zu mehr Effizienz in der Patient*innenversorgung beitragen (z.B. durch gezielten Ressourceneinsatz, Beschränkung auf zentrale Indikatoren, Vermeidung von Mehrfachdokumentationen und doppelte Behandlungen).           |
| <input type="radio"/> | Das Projekt sollte erkennbar zu einer Vermeidung von Über- bzw. Unterversorgung beitragen.                                                                                                                                                 |
| <input type="radio"/> | Das Projekt sollte helfen, die individuellen Bedürfnisse von Patient*innen bzw. Patient*innengruppen besser zu berücksichtigen.                                                                                                            |
| <input type="radio"/> | Das Projekt sollte helfen, das diagnostische bzw. therapeutische Vorgehen bei der Versorgung bestimmter Patient*innengruppen besser zu strukturieren und regeln (z.B. durch klare Versorgungspfade)                                        |
| <input type="radio"/> | Die Teilnahme am Projekt darf keine nennenswerte Veränderung von Arbeitsabläufen, Routinen und Zuständigkeiten innerhalb der Praxis (Praxismanagement) bewirken.                                                                           |
| <input type="radio"/> | Das Projekt sollte dazu beitragen, die Kosten für das Gesundheitssystem insgesamt zu senken.                                                                                                                                               |
| <input type="radio"/> | Das Projekt sollte helfen, Versorgungskrisen frühzeitig zu antizipieren und durch präventive Maßnahmen zu verhindern (z.B. Dekompensation von Demenzerkrankten und/oder deren Angehörigen).                                                |
| <input type="radio"/> | Sonstiges, und zwar:                                                                                                                                                                                                                       |

Bitte beantworten Sie die nachfolgenden Fragen nur, falls Ihnen der Innovationsfonds vor der Bearbeitung dieses Fragebogens **bereits bekannt war** oder Sie bereits an einem entsprechenden Innovationsfonds-Projekt **teilgenommen haben bzw. dies aktuell tun**. Ansonsten gehen Sie bitte direkt über zu **Seite 7**.

5. Ganz allgemein gefragt: Wie beurteilen Sie Innovationsfonds ganz grundsätzlich, wenn Sie zugrunde legen, was Sie bereits darüber gehört haben und ggf. eigene Erfahrungen mit bestimmten Projekten einbeziehen?

- Sehr gut    Eher gut    Eher schlecht    Sehr schlecht    Schwer zu sagen, weiß nicht

**- Fragebogen: Hausärztliche Einstellungen zu und Erfahrungen mit Innovationsfonds-Studien -**

**6. Warum sehen Sie das so? Einige Stichpunkte genügen.**

---



---



---

**7. Wie groß ist Ihrer Einschätzung nach der Nutzen, den der Innovationsfonds insgesamt für die Patient\*innenversorgung in Deutschland hat?**

- Sehr groß    Eher groß    Eher gering    Kein Nutzen    Schwer zu sagen, weiß nicht

**8. Würden Sie sagen, dass sich Ihre grundlegende Einstellung zum Innovationsfonds in den letzten Jahren eher verbessert oder eher verschlechtert hat?**

- Stark verbessert    Etwas verbessert    Gleich geblieben    Eher verschlechtert    Stark verschlechtert

**9. Als Hausarzt\*in kann man ganz unterschiedliche Positionen in Bezug auf den Innovationsfonds vertreten. Hier stehen verschiedene Aussagen, die wir im Rahmen einer Interviewvorstudie mit Hausarzt\*innen erfasst haben. Bitte geben Sie an, inwiefern Sie der jeweiligen Aussage zustimmen.**

|                                                                                                                                                      | Stimme voll und ganz zu | Stimme eher zu        | Stimme eher nicht zu  | Stimme gar nicht zu   | Schwer zu sagen, weiß nicht |
|------------------------------------------------------------------------------------------------------------------------------------------------------|-------------------------|-----------------------|-----------------------|-----------------------|-----------------------------|
| „Innovationsfonds-Projekte haben das Potenzial, nachhaltige Verbesserungen in der Patient*innenversorgung zu bewirken.“                              | <input type="radio"/>   | <input type="radio"/> | <input type="radio"/> | <input type="radio"/> | <input type="radio"/>       |
| „Innovationsfonds-Projekte gehen häufig an der hausärztlichen Versorgungsrealität vorbei.“                                                           | <input type="radio"/>   | <input type="radio"/> | <input type="radio"/> | <input type="radio"/> | <input type="radio"/>       |
| „Der Innovationsfonds ist positiv zu sehen, weil durch ihn komplexe klinische und Versorgungsforschung unabhängig finanziert werden kann.“           | <input type="radio"/>   | <input type="radio"/> | <input type="radio"/> | <input type="radio"/> | <input type="radio"/>       |
| „Der Innovationsfonds ist v.a. eine politisch gewollte Einrichtung; es werden nicht unbedingt Projekte gefördert, die das Gesundheitswesen braucht.“ | <input type="radio"/>   | <input type="radio"/> | <input type="radio"/> | <input type="radio"/> | <input type="radio"/>       |
| „Innovationsfonds-Projekte werden mit ihren Interventionen längerfristig zu einer Aufwertung der hausärztlichen Versorgung führen.“                  | <input type="radio"/>   | <input type="radio"/> | <input type="radio"/> | <input type="radio"/> | <input type="radio"/>       |
| „Innovationsfonds-Projekte führen zu einer Verkomplizierung des Gesundheitswesens, z.B. weil neue Akteure oder Strukturen geschaffen werden.“        | <input type="radio"/>   | <input type="radio"/> | <input type="radio"/> | <input type="radio"/> | <input type="radio"/>       |
| „Der Innovationsfonds bietet Hausarzt*innen die Chance, sich stärker in wissenschaftliche Forschung wie klinische Studien einzubringen.“             | <input type="radio"/>   | <input type="radio"/> | <input type="radio"/> | <input type="radio"/> | <input type="radio"/>       |
| „Ich bezweifle, dass Innovationsfonds-Projekte am Ende den Weg in die Regelversorgung finden.“                                                       | <input type="radio"/>   | <input type="radio"/> | <input type="radio"/> | <input type="radio"/> | <input type="radio"/>       |

- Fragebogen: Hausärztliche Einstellungen zu und Erfahrungen mit Innovationsfonds-Studien -

10. Wie oft ist es bereits vorgekommen, dass Sie gefragt wurden, ob Sie an einem Innovationsfonds-Projekt teilnehmen möchten bzw. es Versuche gab, Sie für ein solches Projekt zu rekrutieren?

- Noch nie  
 1mal     2mal     3-5mal     Mehr als 5mal     Weiß nicht, keine Angabe

11. An wie vielen Innovationsfonds-Projekten haben Sie bereits teilgenommen oder tun dies aktuell? (Addieren Sie bitte frühere und aktuelle Teilnahmen.)

- An keinem => bitte direkt zu **Frage 23** übergehen  
 An 1     An 2     An 3     An mehr als 3     Keine Angabe

12. Bezieht bzw. bezog sich Ihre Teilnahme auf alle oder nur auf bestimmte Krankenkassen?

- Auf alle Krankenkassen     Nur auf bestimmte Krankenkassen     Teils, teils

13. Welchen der folgenden Themengebiete lässt sich das/die Innovationsfonds-Projekt(e), an dem/denen Sie beteiligt sind bzw. waren, zuordnen? (Mehreres kann angegeben werden.)

- |                       |                                                                        |
|-----------------------|------------------------------------------------------------------------|
| <input type="radio"/> | Versorgung in strukturschwachen bzw. ländlichen Gebieten               |
| <input type="radio"/> | Arzneimitteltherapie bzw. Arzneimitteltherapiesicherheit               |
| <input type="radio"/> | Telemedizin, Telematik, eHealth/mHealth                                |
| <input type="radio"/> | Versorgung für spezielle Patient*innengruppen                          |
| <input type="radio"/> | Delegation und Substitution von Leistungen                             |
| <input type="radio"/> | Geriatrische Versorgung                                                |
| <input type="radio"/> | Kommunikation mit Patient*innen und Förderung der Gesundheitskompetenz |
| <input type="radio"/> | Versorgung für Menschen mit Behinderung                                |
| <input type="radio"/> | Sektorenübergreifende bzw. -unabhängige Versorgung                     |
| <input type="radio"/> | Versorgung für spezifische Krankheiten/Krankheitsgruppen               |
| <input type="radio"/> | Stärkung der regionalen Gesundheitsversorgung                          |
| <input type="radio"/> | Versorgung von vulnerablen Gruppen (z.B. pflegende Angehörige)         |
| <input type="radio"/> | Medizinische Leitlinien und deren (Weiter-)Entwicklung                 |
| <input type="radio"/> | Sonstiges                                                              |

**14. Auf welchem Weg haben Sie zu dem/den Innovationsfonds-Projekt(en) gefunden?**

- Ich habe mich selbst gemeldet (z.B. Reaktion auf Lesen einer Bekanntmachung/Werbung)
- Ich wurde aktiv von Projektmitarbeiter\*innen oder Projektpartnern (z.B. Ärztenetzwerke, Krankenkassen) darauf angesprochen und habe mich infolgedessen zur Teilnahme bereit erklärt
- Anderer Weg
- Teils, teils

**15. War es in Folge Ihrer Teilnahme erforderlich, Mitglieder Ihres Praxisteam zu schulen?**

- Ja, war erforderlich     Nein, war nicht erforderlich     Teils, teils

**16. Womit waren Sie hinsichtlich der Innovationsfonds-Projekte, an denen Sie bislang teilgenommen haben, zufrieden bzw. was ist Ihrer Einschätzung nach positiv hervorzuheben? Einige Stichpunkte genügen.**

---

---

---

**17. Und womit waren Sie hinsichtlich der Innovationsfonds-Projekte, an denen Sie bislang teilgenommen haben, eher unzufrieden bzw. was haben Sie als negativ erlebt?**

---

---

---

**18. Die Teilnahme an einem Innovationsfonds-Projekt kann dazu führen, dass Praxisroutinen verändert werden müssen, wodurch sich Komplikationen im Praxisablauf ergeben können. Gab es aufgrund Ihrer Teilnahme an einem oder mehreren Innovationsfonds-Projekten Einschränkungen bzw. Komplikationen im Praxisablauf? (Gemeint sind z.B. Verzögerungen oder Schwierigkeiten)**

- Ja, starke Komplikationen     Ja, moderate Komplikationen     Nein, keine Komplikationen

**19. Wie schätzen Sie das insgesamt ein: Wie stark hat die Versorgung bzw. Therapie der einbezogenen Patient\*innen von den Innovationsfonds-Projekten, an denen Sie bislang teilgenommen haben, profitiert?**

- Sehr stark     Eher stark     Eher nicht so stark     Überhaupt nicht     Schwer zu sagen

**- Fragebogen: Hausärztliche Einstellungen zu und Erfahrungen mit Innovationsfonds-Studien -**

**20. Wenn Sie versuchen würden, eine Bilanz zu ziehen: Inwiefern stand der (Mehr-)Aufwand aufgrund Ihrer Teilnahme an den Innovationsprojekten im Verhältnis zum Nutzen?**

- Nutzen überwog deutlich    Nutzen überwog etwas    Nutzen und (Mehr-)Aufwand in etwa gleich  
 (Mehr-)Aufwand überwog etwas    (Mehr-)Aufwand überwog deutlich    Schwer zu sagen

**21. Ist es schon einmal vorgekommen, dass Sie Ihre Teilnahme an einem Innovationsfonds-Projekt vorzeitig, also vor Projektende, abgebrochen haben?**

- Ja, schon vorgekommen    Nein, nicht vorgekommen => bitte direkt zu **Frage 23** übergehen

**22. Was war der Grund hierfür?**

---

---

**23. Welche Verbesserungen würden Sie sich für die Zukunft bei Innovationsfonds-Projekten wünschen?**

---

---

---

**24. Wie wichtig wäre es Ihrer Ansicht nach, wenn Hausärzt\*innen stärker als bislang in die Konzeption und Entwicklung neuer Innovationsfonds-Projekte einbezogen werden?**

- Sehr wichtig    Eher wichtig    Eher unwichtig    Schwer zu sagen, weiß nicht

**- Fragebogen: Hausärztliche Einstellungen zu und Erfahrungen mit Innovationsfonds-Studien -**

*Zum Schluss bräuchten wir noch einige statistische Angaben von Ihnen. Wie auch der Rest des Fragebogens werden diese Informationen natürlich streng vertraulich behandelt und anonymisiert.*

**Sie sind...**

- Männlich     Weiblich     Divers

Ihr **Alter**: \_\_\_\_\_

**Wo befindet sich Ihre Praxis?** In einer Gemeinde/Stadt mit ...

- mehr als 100.000     20.000 bis 100.000     5.000 bis 20.000     unter 5.000 Einwohnern

**Welches Niederlassungsmodell** beschreibt Ihre Praxis am besten?

- Einzelpraxis (Sie sind der/die einzige Arzt/Ärztin)     Einzelpraxis mit angestellten Ärzt\*innen  
 Gemeinschaftspraxis     Medizinisches Versorgungszentrum     Sonstiges

**Wie viele Patient\*innen** behandelt Ihre Praxis im Quartal?

- 500 - 750     751 - 1000     1001 - 1500     1501 - 2000     Mehr als 2000

Sind Sie Mitglied in einem **(regionalen) Ärzte- bzw. Praxisnetzwerk**?

- Ja     Nein

**Vielen Dank für Ihre Teilnahme!**

**Sollten Sie diese Befragung schriftlich ausgefüllt haben, nutzen Sie bitte den von uns beigefügten Rückumschlag.**

Was möchten Sie uns noch mitteilen? Hier finden Sie Platz für Anregungen, Kommentare und Kritik.

---

---

---
